# Supplementary material
Source: PubMed Central journal article supplement (PMC7012700)
Supplement: NIHMS1536067-supplement-1.pdf [file NIHMS1536067-supplement-1.pdf]

**SUPPLEMENTARY TABLE S1:** Precision and accuracy for 1,3-butadiene metabolites in urine,  
Inter-day (N=10)

| Analyte                               | Added amount (ng/mL) | Expected amount <sup>a</sup> (ng/mL) | Measured mean (ng/mL) | Accuracy (percent of expected) | Precision CV (%) |
|---------------------------------------|----------------------|--------------------------------------|-----------------------|--------------------------------|------------------|
| Sum of MHBMA-1 and MHBMA-2 (MHBMA1+2) | 0                    |                                      | 0.11                  |                                |                  |
|                                       | 0.5                  | 0.610                                | 0.481                 | 78.9                           | 11.2             |
|                                       | 1.0                  | 1.11                                 | 0.887                 | 80.0                           | 11.3             |
|                                       | 5.0                  | 5.11                                 | 4.07                  | 79.6                           | 7.73             |
|                                       | 10                   | 10.11                                | 8.17                  | 80.8                           | 7.93             |
| LOQ                                   | 0.1                  |                                      |                       |                                |                  |
| MHBMA-3                               | 0                    |                                      | 0.035                 |                                |                  |
|                                       | 1.0                  | 1.04                                 | 1.04                  | 100                            | 8.53             |
|                                       | 2.5                  | 2.54                                 | 2.42                  | 95.5                           | 4.82             |
|                                       | 10                   | 10.0                                 | 9.55                  | 95.2                           | 4.84             |
|                                       | 20                   | 20.0                                 | 17.7                  | 88.3                           | 5.16             |
| LOQ                                   | 0.1                  |                                      |                       |                                |                  |

<sup>a</sup>Added amount + mean amount measured in non-smoker's urine

MHBMA-1+2 = sum of isomers 1-hydroxy-3-buten-2-yl-mercapturic acid and 2-hydroxy-3-buten-1-yl-mercapturic acid; MHBMA-3 = 4-hydroxy-2-buten-1-yl-mercapturic acid

LOQ = limit of quantitation

**SUPPLEMENTARY TABLE S2:** Concentrations of urinary biomarkers for Black and White smokers. Biomarkers are presented as raw concentrations, covariate-adjusted standardization of urinary biomarker concentrations, and creatinine-normalized concentrations. The study included a subset of Black and White smokers over the age of 40 who participated in a randomized clinical trial of reduced nicotine content cigarettes between June 2013 and July 2014 at 10 sites across the U.S.

| <b>Biomarker</b>                          | <b>Blacks<br/>(GM, 95% CI)</b> | <b>Whites<br/>(GM, 95% CI)</b> | <b>p value</b> |
|-------------------------------------------|--------------------------------|--------------------------------|----------------|
| TNE (nmol/mL)                             | 40.8 (36.2 - 46.0)             | 43.2 (38.2 - 49.0)             | 0.301          |
| TNE (nmol/mL) (covariate-adjusted) †      | 40.6 (36.7 - 45.0)             | 43.3 (38.7 - 48.5)             | 0.152          |
| TNE (nmol/mg) (creatinine-normalized)     | 40.6 (36.6 - 45.0)             | 56.9 (50.7 - 63.8)             | <0.001         |
| NNAL (pmol/mL)                            | 1.10 (0.96 - 1.27)             | 1.45 (1.28 - 1.65)             | 0.005          |
| NNAL (pmol/mL) (covariate-adjusted) †     | 1.09 (0.97 - 1.23)             | 1.45 (1.30 - 1.61)             | <0.001         |
| NNAL (pmol/mg) (creatinine-normalized)    | 1.09 (0.97 - 1.24)             | 1.91 (1.72 - 2.13)             | <0.001         |
| 2-HPMA (ng/mL)                            | 62.1 (54.5 - 70.7)             | 62.6 (53.5 - 73.4)             | 0.756          |
| 2-HPMA (ng/mL) (covariate-adjusted) †     | 62.1 (56.0 - 68.9)             | 62.6 (55.8 - 70.3)             | 0.832          |
| 2-HPMA (ng/mg) (creatinine-normalized)    | 62.0 (55.9 - 68.8)             | 82.3 (73.3 - 92.5)             | <0.001         |
| 3-HPMA (ng/mL)                            | 1007 (869 - 1166)              | 965 (834 - 1116)               | 0.882          |
| 3-HPMA (ng/mL) (covariate-adjusted) †     | 1007 (907 - 1117)              | 965 (864 - 1077)               | 0.709          |
| 3-HPMA (ng/mg) (creatinine-normalized)    | 1005 (904 - 1119)              | 1268 (1136 - 1416)             | 0.001          |
| AAMA (ng/mL)                              | 205 (181 - 232)                | 200 (175 - 229)                | 0.834          |
| AAMA (ng/mL) (covariate-adjusted) †       | 205 (190 - 220)                | 200 (185 - 217)                | 0.856          |
| AAMA (ng/mg) (creatinine-normalized)      | 204 (190 - 220)                | 263 (243 - 285)                | <0.001         |
| CNEMA (ng/mL)                             | 182 (158 - 210)                | 184 (159 - 212)                | 0.377          |
| CNEMA (ng/mL) (covariate-adjusted) †      | 182 (164 - 202)                | 184 (163 - 206)                | 0.281          |
| CNEMA (ng/mg) (creatinine-normalized)     | 182 (164 - 202)                | 241 (214 - 272)                | <0.001         |
| HEMA (ng/mL)                              | 3.67 (3.09 - 4.36)             | 3.46 (2.94 - 4.06)             | 0.739          |
| HEMA (ng/mL) (covariate-adjusted) †       | 3.67 (3.18 - 4.24)             | 3.46 (3.02 - 3.95)             | 0.732          |
| HEMA (ng/mg) (creatinine-normalized)      | 3.67 (3.17 - 4.24)             | 4.54 (3.97 - 5.20)             | 0.015          |
| HPMMA (ng/mL)                             | 209 (160 - 274)                | 201 (156 - 260)                | 0.556          |
| HPMMA (ng/mL) (covariate-adjusted) †      | 209 (162 - 270)                | 201 (159 - 256)                | 0.402          |
| HPMMA (ng/mg) (creatinine-normalized)     | 209 (162 - 269)                | 265 (209 - 336)                | 0.013          |
| MHBMA-1+2 (ng/mL)                         | 1.23 (1.03 - 1.46)             | 1.20 (0.99 - 1.46)             | 0.603          |
| MHBMA-1+2 (ng/mL) (covariate-adjusted) †  | 1.23 (1.05 - 1.44)             | 1.20 (1.01 - 1.44)             | 0.619          |
| MHBMA-1+2 (ng/mg) (creatinine-normalized) | 1.23 (1.05 - 1.43)             | 1.58 (1.32 - 1.89)             | 0.004          |
| MHBMA-3 (ng/mL)                           | 0.12 (0.11 - 0.14)             | 0.14 (0.13 - 0.15)             | 0.056          |
| MHBMA-3 (ng/mL) (covariate-adjusted) †    | 0.12 (0.11 - 0.14)             | 0.14 (0.12 - 0.16)             | 0.082          |
| MHBMA-3 (ng/mg) (creatinine-normalized)   | 0.12 (0.11 - 0.14)             | 0.18 (0.16 - 0.21)             | <0.001         |
| MMA (ng/mL)                               | 19.8 (16.6 - 23.6)             | 14.9 (12.9 - 17.3)             | 0.023          |
| MMA (ng/mL) (covariate-adjusted) †        | 19.8 (17.0 - 23.1)             | 14.9 (13.3 - 16.7)             | 0.003          |
| MMA (ng/mg) (creatinine-normalized)       | 19.8 (16.9 - 23.2)             | 19.6 (17.5 - 22.0)             | 0.954          |
| PMA (ng/mL)                               | 1.16 (1.00 - 1.35)             | 1.25 (1.06 - 1.49)             | 0.242          |
| PMA (ng/mL) (covariate-adjusted) †        | 1.16 (1.02 - 1.32)             | 1.25 (1.08 - 1.46)             | 0.257          |
| PMA (ng/mg) (creatinine-normalized)       | 1.16 (1.02 - 1.32)             | 1.65 (1.41 - 1.92)             | <0.001         |

TNE = total nicotine equivalents (nmol/mL); NNAL = 4-(methylnitrosamino)-1-(3-pyridyl)-1-butanol (pmol/mL); units of VOC metabolites are ng/mL; 2-HPMA = 2-hydroxypropylmercapturic acid (propylene oxide); 3-HPMA = 3-hydroxypropylmercapturic acid (acrolein); AAMA = 2-

carbamoylethylmercapturic acid (acrylamide); CNEMA = 2-cyanoethylmercapturic acid (acrylonitrile); HEMA = 2-hydroxyethylmercapturic acid (acrylonitrile, vinyl chloride, ethylene oxide); HPMMA = 3-hydroxy-1-methyl-propylmercapturic acid (crotonaldehyde); MHBMA-1+2 = sum of isomers 1-hydroxy-3-buten-2-yl-mercapturic acid and 2-hydroxy-3-buten-1-yl-mercapturic acid (1,3-butadiene); MHBMA-3 = 4-hydroxy-2-buten-1-yl-mercapturic acid (1,3-butadiene); MMA = methylmercapturic acid (methylating agents); and, PMA = phenylmercapturic acid (benzene)

† The covariate-adjusted concentrations were determined using a method from a previously published paper (“Method 3”).(1)

## REFERENCES

1. O’Brien KM, Upson K, Cook NR, Weinberg CR. Environmental chemicals in urine and blood: improving methods for creatinine and lipid adjustment. *Environ Health Perspect.* 2016;124:220-7.
